# Supplementary material for: SrMnO3/Functionalized h-BN Composite Modified Disposable Sensor for the Voltammetric Determination of Furaltadone Antibiotic Drug
Source: MDPI journal article supplement (doi:10.3390/catal12121494), 2022-11-22
Supplement: s1 [file s1]

Archive with 1 entries (1 files):
- catalysts-1983958-supplementary.pdf
